1 **Article title: Building a robust chromatin immunoprecipitation**  
2 **(ChIP) method with substantially improved efficiency**

3  
4 Huimin Zhao<sup>1</sup>, Hongyan, Li<sup>1</sup>, Yaqi Jia<sup>1</sup>, Xuejing Wen<sup>1</sup>, Huiyan Guo<sup>1</sup>, Hongyun Xu<sup>1</sup>,  
5 Yucheng Wang<sup>1\*</sup>

6

7 <sup>†</sup> Huimin Zhao and Hongyan Li contributed equally to this work.

8 <sup>1</sup>State Key Laboratory of Tree Genetics and Breeding, Northeast Forestry University,  
9 26 Hexing Road, Harbin 150040, China

10

11 **Running title: Building an efficient ChIP method**

12

13 **\* Corresponding author details:**

14 **Yucheng Wang:** [wangyucheng@ms.xjb.ac.cn](mailto:wangyucheng@ms.xjb.ac.cn)

15 State Key Laboratory of Tree Genetics and Breeding, Northeast Forestry University,  
16 26 Hexing Road, Harbin 150040, China

17 Tel: +86-451-82190607-11

18 Fax: +86-451-82190607-11

19

20 **One sentence summary:**

21 Building a ChIP method that increases fold enrichment of birch by 16 folds in average and is  
22 adapted for both woody and herbaceous plants.

23

24 **Authors' contributions**

25 YCW conceived and directed the project. HMZ and HYL performed the experiments;  
26 HMZ, XJW, YQJ performed the overall data analysis; HMZ, HYX provides  
27 Arabidopsis AST1 overexpression transgenic seeds; HYG provide MYB

28 over-expressing strains; YCW wrote the manuscript; all authors revised the  
29 manuscript. All authors read and approved the final manuscript.

30

### 31 **Funding**

32 This work was supported by National Natural Science Foundation of China (No.  
33 31770704) and the Overseas Expertise Introduction Project for Discipline Innovation  
34 (B16010). The funders had no role in the study design, data collection and analysis,  
35 decision to publish, or the manuscript preparation.

36

37

### 38 **ABSTRACT**

39 Chromatin immunoprecipitation (ChIP) is the gold-standard method to detect the  
40 interactions between proteins and chromatin, and is a powerful tool to identify  
41 epigenetic modifications. Although ChIP protocols for plant species have been  
42 developed, many specific features of plants, especially woody plants, still hinder the  
43 efficiency of immunoprecipitation, resulting inefficient ChIP enrichment. There is an  
44 active demand for a highly efficient ChIP protocol. In the present study, we employed  
45 *Betula platyphylla* (birch) and *Arabidopsis thaliana* as the research materials, and five  
46 factors closely associated with ChIP efficiency were identified, including crosslinking,  
47 chromatin concentration using centrifugal filter, using new immunoprecipitation  
48 buffer, rescue DNA with proteinase K, and using sucrose to increase  
49 immunoprecipitation efficiency. Optimization of any these factors can significantly  
50 improve ChIP efficiency. Considering these factors together, a robust ChIP protocol  
51 was developed, for which the average fold enrichments were 16.88 and 6.43 fold of  
52 that gained using standard ChIP in birch and Arabidopsis, respectively. As this built  
53 ChIP method works well in both birch and Arabidopsis, it should be also suitable for  
54 other woody and herbaceous species. In addition, this ChIP method make it is possible  
55 to detect low-abundance TF-DNA interactions, and may extend the application of  
56 ChIP in plant kingdom.

57

58 **Key words:** *Arabidopsis thaliana*, *Betula platyphylla*, centrifugal filter, chromatin  
59 immunoprecipitation, ChIP, cross-linking reversal, sucrose,

60

## 61 INTRODUCTION

62 Chromatin immunoprecipitation (ChIP) is an important technique that is widely used  
63 to examine epigenetic modifications or identify protein-DNA interactions.  
64 Transcription factors (TFs) bind to regulatory sequences to modulate gene expression,  
65 and gene expression regulation plays an essential role in various of cellular processes.  
66 However, which genes are directly regulated by the TFs, and how the TFs control  
67 gene expression *in vivo*, remain largely unknown. ChIP is a powerful tool to identify  
68 genes that are regulated directly by certain TFs and to address TFs' recognition of  
69 their target genes *in vivo*. In addition, combined with high throughput sequencing  
70 technology, ChIP-seq has become the gold-standard method to detect binding regions  
71 for TFs on a genome-wide scale (Verkest *et al.*, 2014). However, current ChIP  
72 procedures have shortcomings in terms of the overall inefficiency of ChIP enrichment,  
73 making it difficult to detect low-abundance TF-DNA interactions (Verkest *et al.*,  
74 2014).

75 Although ChIP protocols for plant species have been developed (Bowler *et al.*,  
76 2004, Gendrel *et al.*, 2005, Saleh *et al.*, 2008, Kaufmann *et al.*, 2010), some specific  
77 features of plants species, such as rigid cell walls, chloroplasts, the paucity of nuclei  
78 in some tissues, and large vacuoles, all markedly hinder the immunoprecipitation of  
79 DNA and represent a challenge for TF-DNA enrichment. Therefore, genome-wide  
80 ChIP studies of plant species are lagging behind those of other eukaryotic systems  
81 (Verkest *et al.*, 2014). In addition, woody plants have thick-walled cells, and high  
82 levels of phenolics and/or polysaccharides, which adversely affect many key steps in  
83 ChIP procedures that have been optimized for tissues or cells of non-woody plants (Li  
84 *et al.*, 2014). An alternative approach to ChIP, Chromatin Affinity Purification (ChAP),  
85 had been proposed, which does not require immunoprecipitation, and is effective in  
86 plant chromatin studies (Zentner *et al.*, 2014). Additionally, tandem chromatin affinity  
87 purification (TChAP) has also been developed in *Arabidopsis thaliana* plants, which  
88 can greatly improve DNA enrichment efficiency compared with ChIP (Verkest *et al.*,  
89 2014). However, both ChAP and TChAP cannot be used in epigenetic studies, such as  
90 post-translational histone modifications, and standard ChIP is the most used method in

91 epigenetics. At the same time, in the study of TF-DNA interactions, standard ChIP is  
92 still widely used in most case studies because of its properties. Therefore, standard  
93 ChIP is an important tool in molecular biology investigations. Standard ChIP does not  
94 work well in some plant species, especially woody plants; therefore, there is an active  
95 demand to overcome the inefficiency of ChIP enrichment, and to improve standard  
96 ChIP to make it suitable for both woody and herbaceous plants.

97 In the present study, we studied the factors that influence the efficiency of standard  
98 ChIP, and some key processes in the ChIP protocol were identified and optimized.  
99 Consideration of the factors involved in ChIP efficiency allowed us to develop a ChIP  
100 method that could significantly improve ChIP efficiency and could work well in  
101 woody and herbaceous plants. In addition, the results obtained in the present study  
102 could be used to develop an efficient ChIP protocol for use in other eukaryotic species,  
103 and the strategies and technologies used to optimize ChIP could also be used in other  
104 techniques that involve immunoprecipitation.

105

106

## 107 **RESULTS**

### 108 **Crosslinking using 3% formaldehyde can resist decrosslinking caused by** 109 **sonication better than 1% formaldehyde**

110 Decrosslinking of chromatin during ChIP will reduce the yield. Sonication  
111 treatment can cause decrosslinking of chromatin; therefore, we first studied whether  
112 different concentrations of formaldehyde treatment could affect the decrosslinking  
113 caused by sonication. Birch plants (*Betula platyphylla*) were crosslinked using 1%  
114 and 3% formaldehyde, respectively, and then treated with sonication for chromatin  
115 fragment. After sonication, the decrosslinked DNA was harvested by extraction with  
116 Tris-phenol and chloroform, and analyzed using quantitative real-time polymerase  
117 chain reaction (qPCR). The results showed that 3% formaldehyde treatment could  
118 reduce the decrosslinking of chromatin by 0.7–2.98 fold compared with 1%  
119 formaldehyde treatment after sonication (Fig. 1). Therefore, considering the effects of

---

120 decrosslinking chromatin caused by sonication, it is better to crosslink chromatin and  
121 proteins using 3% formaldehyde rather than 1% formaldehyde.

122

123 **The concentration of the crosslinked chromatin significantly increases the**  
124 **immunoprecipitation efficiency**

125 To study the effects of the concentration of formaldehyde-crosslinked-chromatin on  
126 immunoprecipitation, the sonicated chromatin from transgenic birch overexpressing  
127 *BplMYB46* was purified and concentrated using a 30 kDa cutoff centrifugal filter, and  
128 then the same quantity of antibody for immunoprecipitation as standard ChIP method  
129 was used. The standard ChIP procedure (described in the section of “Procedure for  
130 standard ChIP”) was also performed as the control. ChIP-qPCR was performed to  
131 check the efficiency of the enrichment of ChIP products. Four genes whose promoters  
132 had been confirmed to be bound by *BplMYB46* in birch were analyzed. After the  
133 chromatin was concentrated using protein centrifugal filters, the enrichment increased  
134 markedly to 2.01 to 3.31-fold higher than that gained without using the centrifugal  
135 filter (Fig. 2). These results suggested that concentration of the crosslinked chromatin  
136 using a protein centrifugal filter is quite important for immunoprecipitation, resulting  
137 in a significant increase in immunoprecipitation efficiency and improving the  
138 enrichment of ChIP DNA.

139

140 **A new buffer for immunoprecipitation in ChIP**

141 The immunoprecipitation buffer is very important for the immunoprecipitation and  
142 enrichment of ChIP DNA. To optimize the immunoprecipitation buffer, we developed  
143 a new buffer, termed optimized immunoprecipitation (OIP) buffer, which has a similar  
144 pH value (pH = 7.4) to that of the plant nucleus (Shen et al., 2013). ChIP was  
145 performed using the OIP buffer, and the classic IP buffer (ChIP Ab incubation buffer)  
146 was used as a control. The ChIP-qPCR results showed that using the OIP buffer  
147 improved the efficiency of ChIP significantly, with an enrichment of 2.58–4.72-fold  
148 compared with that gained using the ChIP Ab incubation buffer (Fig. 3). These results  
149 suggested that the OIP buffer is more efficient for immunoprecipitation than the ChIP

150 Ab incubation buffer.

151

### 152 **Determination of the most suitable NaCl concentration for immunoprecipitation**

153 Previous research showed that 150 mM NaCl is not a suitable concentration for  
154 immunoprecipitation (Li *et al.*, 2014); therefore, we determined whether 150 mM  
155 NaCl is a suitable concentration for immunoprecipitation in the OIP buffer. OIP  
156 buffers with NaCl at 100, 120, 150, and 170 mM were used, and the concentrations of  
157 the other reagents in the OIP buffer are unchanged. The results showed that 150 mM  
158 NaCl displayed highest immunoprecipitation efficiency, followed by 170 mM NaCl;  
159 however, 100 and 120 mM NaCl showed relatively low immunoprecipitation  
160 efficiency (Fig. 4). This result suggested that 150 mM NaCl is the most suitable  
161 concentration for immunoprecipitation in the OIP buffer.

162

### 163 **Sucrose plays an important role in improvement of immunoprecipitation**

164 To determine whether sucrose is involved in immunoprecipitation efficiency, OIP  
165 buffers containing 0, 5, 7, 9, and 11% (w/v) sucrose were made, and  
166 immunoprecipitation was performed. ChIP-qPCR analysis was used to determine the  
167 immunoprecipitation efficiency. The results showed that sucrose at 5–11% could  
168 improve the efficiency of immunoprecipitation (Fig. 5). In addition, 7% sucrose had  
169 the largest effect on immunoprecipitation efficiency, producing an enrichment of  
170 3.54–7.41-fold compared with that of the control (Fig. 5). Therefore, sucrose plays an  
171 important role in immunoprecipitation improvement, and 7% sucrose was identified  
172 as the most suitable sucrose concentration for immunoprecipitation.

173

### 174 **Optimization of the crosslinking reversal step**

175 Next, we optimized the procedure for reversing the crosslinking between chromatin  
176 and proteins. The ChIP procedure was performed according to the standard ChIP  
177 protocol. After elution of the ChIP DNA, the elution product was divided into two  
178 equal portions. Proteinase K was added to one portion for crosslinking reversal, and  
179 the other portion was reverse crosslinked using NaCl overnight (standard protocol).

---

180 The ChIP-qPCR results showed that the enrichment of ChIP DNA using Proteinase K  
181 digestion increased by 2.41–3.20-fold compared with that achieved using the  
182 NaCl-mediated classic crosslinking reversal procedure (Fig. 6).

183 We further compared three different crosslinking reversal methods: (1) proteinase K  
184 direct treatment; (2) reverse crosslinking using NaCl; and (3) proteinase K treatment  
185 after reversing crosslink using NaCl. Tris-phenol and chloroform extraction was  
186 performed to remove the crosslinked DNA, and agarose gel electrophoresis was used  
187 to monitor the amount of DNA released by crosslinking reversal. The results showed  
188 that crosslinking reversal using NaCl overnight could not completely de-crosslink the  
189 DNA; however, direct proteinase K digestion and proteinase K digestion after NaCl  
190 crosslinking reversal could completely de-crosslink the DNA (Fig. 7). In addition,  
191 compared with the other two approaches, direct proteinase K digestion was a time  
192 saving and simpler method (Fig. 7).

193

#### 194 **Building an improved ChIP protocol and determination of its** 195 **immunoprecipitation efficiency**

196 Based on the above results, we developed a new ChIP protocol. The procedures are  
197 shown in Figure 8. The first improvement is that 3% formaldehyde was used for  
198 chromatin crosslinking instead of 1% formaldehyde, which would reduce the  
199 decrosslinking caused by sonication. The second improvement is that a protein  
200 centrifugal filter was used to concentrate the chromatin. The third improvement was  
201 the use of OIP buffer to substitute for classic ChIP Ab incubation buffer for  
202 immunoprecipitation. The fourth improvement was the addition of sucrose to increase  
203 immunoprecipitation. Finally, in the crosslinking reversal step, proteinase K was used  
204 to directly digest proteins, which takes no more than 2 h and achieves complete  
205 reversal of DNA crosslinking (Fig. 8).

206 Following this improved ChIP protocol, we determined its ChIP efficiency.  
207 ChIP-qPCR showed that the fold enrichment using the improved ChIP method was  
208 5.43–20.53-fold (average = 16.88-fold) higher than that achieved using standard ChIP  
209 (Fig. 9). Consistently, repeating the experiment in Arabidopsis plants also showed an

---

210 enrichment of 4.31–9.39-fold (average = 6.43-fold) using the improved ChIP method  
211 compared with that achieved using the standard ChIP method (Fig. 9a, b). In addition,  
212 the negative control genes were not enriched using the improved ChIP protocol  
213 compared with that gained using the standard ChIP method, suggesting that the  
214 improved ChIP method results in a lower background (Fig. 9a, b). At the same time,  
215 when using the transgenic Arabidopsis plants expressing GFP gene only as material,  
216 no fold enrichment of the aim DNA was observed (Fig. 9c), suggesting that this ChIP  
217 method can specially enrich aim DNA. Taken together, these results indicated that the  
218 improved ChIP procedure improved the efficiency of ChIP markedly.

219

## 220 **DISCUSSION**

221 We studied the factors that influence immunoprecipitation efficiency in ChIP, and  
222 then built a robust ChIP protocol, which could significantly improve the enrichment  
223 of ChIP DNA compared with that achieved using the standard ChIP protocol (Fig. 9).

224 Compared with the commonly used standard ChIP protocol and the protocol of Li  
225 et al. (2014), this procedure has the following differences. (1) The use of 3%  
226 formaldehyde for crosslinking to reduce de-crosslinking during sonication; (2)  
227 concentration of crosslinked-chromatin using a centrifugal filter before  
228 immunoprecipitation; (3) adding sucrose to increase the efficiency of the interaction  
229 between the antibody and the antigen; (4) using a more suitable buffer for  
230 immunoprecipitation; and (5) recovery of DNA from crosslinked chromatin using  
231 proteinase K digestion instead of NaCl reversal.

232

### 233 **Concentration of crosslinked-chromatin is important for immunoprecipitation**

234 In the present study, protein ultrafiltration was employed to concentrate the  
235 crosslinked-chromatin, which has the following four advantages: (1) This procedure  
236 could eliminate some components released from cells that might inhibit the interaction  
237 between the antigen and the antibody, and could also completely remove SDS that  
238 will inhibit immunoprecipitation; (2) protein ultrafiltration can change the lysis buffer



---

239 for the buffer that is most suitable for the antigen–antibody interaction, which would  
240 greatly increase the efficiency of immunoprecipitation (Fig. 2); (3) the small  
241 molecular weight (<100 kDa) proteins that do not cross-link with chromatin are  
242 eliminated using ultrafiltration, which could reduce the background of  
243 immunoprecipitation; and (4) this process can adjust the concentration of  
244 crosslinked-chromatin to a suitable level for immunoprecipitation. By contrast, it is  
245 difficult to solve the above four problems in the standard ChIP protocol. The results  
246 showed that concentration of crosslinked chromatin using protein centrifugal filters  
247 could significantly increase the efficiency of immunoprecipitation (Fig. 2). In addition,  
248 in the present study, the concentration of crosslinked chromatin might not have been  
249 the most appropriate for immunoprecipitation, and further adjustments to this  
250 concentration might increase immunoprecipitation efficiency.

251

### 252 **Proteinase K digestion is efficient in rescue DNA from crosslinked chromatin**

253 Incubation of crosslinked chromatin in 0.2 M NaCl solution at 65 °C overnight is a  
254 commonly used method to reverse DNA crosslinking. Some ChIP procedures also use  
255 proteinase K for digestion after incubation in 0.2 M NaCl solution at 65 °C overnight  
256 or for at least 6 h (Li *et al.*, 2014, Tsugama *et al.*, 2013, Haring *et al.*, 2007). In the  
257 modified procedure, we used proteinase K to directly digest proteins and recover  
258 DNA, which could be completed within 2 h. ChIP-qPCR showed that this method  
259 increased the enrichment of ChIP products compared with using NaCl to reverse  
260 crosslinking (Fig. 6), and has similar efficiency in DNA recovery compared with  
261 proteinase K treatment after NaCl incubation (Fig. 6). However, direct proteinase K  
262 treatment could save processing time. This method is simple and time saving;  
263 therefore, it could be used commonly to reverse crosslinking in many experiments.

264

### 265 **OIP buffer can significantly improve immunoprecipitation efficiency**

266 The interactions between the antigen and the antibody is the key procedure in ChIP;  
267 therefore, its optimization is important. In many ChIP protocols, the pH value of the  
268 immunoprecipitation buffer is 8.0, which is higher than the pH of the nucleus;

---

269 therefore, it might not be most appropriate for the immune interaction. In this study,  
270 we employed HEPES-NaOH in the OIP buffer to achieve a pH value of 7.5, which is  
271 close to the pH value in the nucleus according to Shen et al (2013). Moreover, some  
272 reagents in the buffer were also optimized. Experiments showed that the OIP buffer  
273 could improve the immunoprecipitation efficiency greatly compared with using the  
274 ChIP Ab incubation buffer from the in standard ChIP protocol (Fig. 3). Therefore, the  
275 OIP buffer is more suitable for use in ChIP in plants than the ChIP Ab incubation  
276 buffer.

277

### 278 **Sucrose is important in improvement of immunoprecipitation**

279 To improve the efficiency of immunoprecipitation, we further studied other  
280 reagents, including sucrose, trehalose, PEG, and glycerol (data not shown). Among  
281 them, only sucrose displayed significantly increased efficiency of  
282 immunoprecipitation. In addition, the results showed that 5–11% sucrose could  
283 improve immunoprecipitation (Fig. 5). The role of sucrose in improving  
284 immunoprecipitation has not been reported previously. Thus, to increase  
285 immunoprecipitation efficiency sucrose could be used in experiments involving  
286 interactions between the antibody and the antigen.

287

### 288 **The reason for using birch plants as researching material**

289 In the present study, we use birch as the plant material for ChIP investigation. Birch  
290 is a woody plant species that is distributed widely in the cold temperate zone from  
291 Europe to Asia, and shares many characteristics with other woody plants in terms of  
292 its structure and composition. In addition, birch contains substantially higher levels of  
293 chemical components compared with other woody plants, including polysaccharides  
294 and polyphenols, which make it difficult to isolate DNA, RNA, or protein from this  
295 plant (especially from the mature leaves of birch) compared with many other woody  
296 plant species. Our developed ChIP protocol works well in birch; therefore, it should  
297 also work well in other woody plant species. The improved ChIP works well in birch  
298 and Arabidopsis; therefore, it could be adapted for use in other woody and herbaceous

299 plants.

300 We should note that ChIP efficiency was improved more in birch than in  
301 Arabidopsis using the improved ChIP protocol (Fig. 9). This might be explained by  
302 the fact that birch has many kinds of metabolites, such as polysaccharides and  
303 polyphenols, which will reduce immunoprecipitation efficiency quite highly than  
304 Arabidopsis plants, leading to the standard ChIP procedure not working well.  
305 Therefore, there is a large scope for improvement using the newly developed ChIP  
306 protocol. However, in Arabidopsis, there are few metabolites that hinder the  
307 immunoprecipitation efficiency compared with that in birch, and the standard ChIP  
308 could work well, resulting limited improvement in ChIP efficiency compared with  
309 that achieved in birch. Therefore, this improved ChIP protocol might be more useful  
310 in the plants that have abundant metabolites that hinder immunoprecipitation  
311 efficiency.

312

## 313 **CONCLUSIONS**

314 In the present study, an improved ChIP protocol was developed that includes five  
315 improved procedures: (1) Crosslinking proteins and chromatin using 3%  
316 formaldehyde instead of 1% formaldehyde; (2) concentration of crosslinked  
317 chromatin; (3) using an optimized IP buffer; (4) the addition of sucrose to improve  
318 immunoprecipitation efficiency; and (5) the use of proteinase K to digest proteins  
319 crosslinked with DNA (Fig. 8). Improvement of each of the above procedures could  
320 increase the enrichment of ChIP DNA significantly. Together, these five  
321 improvements could increase the enrichment of ChIP DNA greatly. In addition, this  
322 study might also provide helpful guidance to improve other experiments involving  
323 immunoprecipitation.

324

## 325 **MATERIALS AND METHODS**

### 326 **Plant materials and the DNA sequences used in ChIP**

327 Two kinds of plant species were used as research materials, i.e. a woody plant  
328 species, birch (*B. platyphylla*), and a herbaceous plant species, *A. thaliana*. Four genes

---

329 that had been identified to be directly regulated by BplMYB46 in birch (Guo *et al.*,  
330 2017), and birch plants overexpressing BplMYB46-FLAG (*BplMYB46*, Genbank  
331 number: KP711284) were used in the ChIP experiments. Four genes that were directly  
332 regulated by AST1 (*AST1*, AT3G24860) in *A. thaliana* (Xu *et al.*, 2018), and the  
333 Arabidopsis plants overexpressing AST1-GFP were also used.

334

### 335 **Procedure for standard ChIP**

336 The ChIP procedure followed that of Haring et al (2007) with some modifications.  
337 The detailed procedures were as follows: **Plant material and crosslinking:** (1) One  
338 gram of plant sample (aerial part; for birch sample used that is 5cm in height; for  
339 Arabidopsis sample, 4-week-old T3 transgenic plants were used) was incubated in 30  
340 ml of buffer A to cross-link the protein and DNA under vacuum conditions for 10 min.  
341 Then, the sample was added with 2.5 ml of 2 M glycine, mixed well, and incubated  
342 for 5 min to stop the cross-linking reaction. The solution was removed from the  
343 sample, which was washed twice with cold milliQ water, and excess moisture was  
344 thoroughly removed using paper towels. **Nuclei isolation:** (2) The samples were  
345 ground to a fine powder under liquid nitrogen, add with 30 ml of buffer B, and mixed  
346 well. The following procedures were all performed on ice. (3) The solution was  
347 filtered through four layers of Miracloth, and the filtrate was collected into a new 50  
348 ml tube, and centrifuged for 20 min at  $2,800 \times g$  at 4 °C. The precipitates were  
349 resuspended in 20 ml of buffer C, and the solution was centrifuged for 10 min at  
350  $12,000 \times g$  and 4 °C; this step was repeated until the precipitate became white. (4) The  
351 precipitate was resuspended in 300  $\mu$ l of buffer D as the sample solution. Then, 600  $\mu$ l  
352 of buffer E was added to a new 1.5 ml tube, and overlaid with the sample solution  
353 before centrifugation at  $12000 \times g$  for 45 min at 4 °C. **Chromatin sonication:** (5) The  
354 supernatant was removed and the pellet was resuspend in 320  $\mu$ l of lysis buffer; a 10  
355  $\mu$ l aliquot sampled as “unsheared chromatin”. (6) The chromatin solution was sheared  
356 into 200- to 1000-bp fragments using an ultrasonic homogenizer (Scientz-IID, Scientz  
357 Biotechnology, Ningbo, China) with the following parameters: Sonication for 3 sec  
358 and stopping for 15 sec, at 10% power setting for a total of 20 min. (7) The sonicated

---

359 chromatin was centrifuged at  $12,000 \times g$  for 5 min at 4 °C. A 10  $\mu$ l aliquot of the  
360 chromatin solution was sampled to check the sonication efficiency. Then, a 50- $\mu$ l  
361 aliquot of the supernatant was reserved as the Input sample. **Chromatin preclearing:**  
362 (8) Then, 200  $\mu$ l of the supernatant was diluted 10-fold by adding 1.8 ml of ChIP Ab  
363 incubation buffer. Washed and blocked protein A/G Agarose beads (40  $\mu$ l) were added  
364 to the chromatin solution and the mixture was incubated for 1 h at 4 °C with gentle  
365 agitation (12 rpm). The chromatin solution was then centrifuged at  $1000 \times g$  at 4 °C  
366 for 5 min to pellet the beads. **Preparation of washed and blocked protein A/G**  
367 **agarose beads:** (9) The supernatant of the protein A/G agarose beads (150  $\mu$ l) was  
368 removed by centrifugation at  $1000 \times g$  for 5 min, and 1 ml of ChIP Ab incubation  
369 buffer was added. The beads were centrifuged at  $1000 \times g$  for 5 min to precipitate the  
370 beads. This rinsing process was repeated twice. The beads were resuspended in 150  $\mu$ l  
371 of ChIP Ab incubation buffer with bovine serum albumin (BSA) to a final  
372 concentration of 10  $\mu$ g/ml. **Immunoprecipitation:** (10) Two portions of 600  $\mu$ l of the  
373 chromatin solution from step 8 were taken, one portion was added with 6  $\mu$ l of  
374 anti-GFP or anti-FLAG antibodies as the ChIP sample (ChIP+), the other was added  
375 with 6  $\mu$ l anti-HA antibody as the mock control (ChIP-), and both were incubated at  
376 4 °C overnight. (10) Washed protein A/G Agarose beads (60  $\mu$ l) were added to the two  
377 tubes, respectively. The tubes were incubated for 3 h at 4 °C with gentle agitation. (12)  
378 The tubes were centrifuged for 5 minutes at  $1000 \times g$  at 4 °C to precipitate the beads.  
379 **Washing:** (13) The beads were washed for 10 min sequentially with 1 ml of the  
380 following buffers: Low Salt Buffer, high salt buffer, LiCl wash buffer, and TE buffer.  
381 (14) Then, 250  $\mu$ l of prewarmed (65 °C) elution buffer (50mM Tris pH 8.0, 10 mM  
382 EDTA, 1% SDS) was added, and the beads were resuspended by tapping and  
383 incubated at room temperature for 15 min (mixing at 5-min intervals). The beads were  
384 centrifuged for 5 minutes at  $2000 \times g$ , the supernatant was transferred into a new tube,  
385 the elution step was repeated once, and the two eluates were mixed together. **Reverse**  
386 **crosslinking:** (15) 5 M NaCl solution was added to the IP or mock control elution to  
387 achieve a concentration of 0.2 M NaCl. Then, 100  $\mu$ l of TE buffer was added to the  
388 input sample, and 5 M NaCl was added to a concentration of 0.2 M NaCl. All samples

389 were reverse cross-linked overnight at 65 °C. **DNA purification:** (16) The reverse  
390 crosslinked samples were purified using a DNA purification spin column (Qiagen,  
391 Hilden, Germany), and the column was eluted twice with 60 µl of TE buffer. Fold  
392 enrichment calculation was following Haring et al (2007).

393

#### 394 **Analysis of chromatin decrosslinking caused by sonication**

395 To investigate the effects of different concentrations of formaldehyde on chromatin  
396 decrosslinking caused by sonication, birch plant samples were crosslinked with 1% or  
397 3% formaldehyde and treated by sonication as described in “Procedure for standard  
398 ChIP”. After sonication, the decrosslinked chromatin was harvested by extraction with  
399 an equal volume of Tris-phenol and chloroform, and the supernatant was further  
400 extracted using an equal volume of chloroform. Then, the decrosslinked DNA was  
401 harvested from the supernatant using a PCR purification kit (Qiagen). The extent of  
402 DNA decrosslinking was analyzed using quantitative PCR.

403

#### 404 **Analysis of the effects of concentration of crosslinked chromatin**

405 To concentrate the crosslinked chromatin, the chromatin was sonicated, centrifuged  
406 (according to step 7 in the above ChIP protocol), and diluted 10-fold by adding ChIP  
407 Ab incubation buffer (which dilutes the SDS to 0.1% to avoid micelle formation,  
408 which would affect protein ultrafiltration), and the sonicated chromatin was purified  
409 using protein centrifugal filters (30 kDa cutoff, Millipore, Billerica, MA, USA) to 300  
410 µl, then added with 2700 µl of ChIP Ab incubation buffer, mixed well, and  
411 concentrated with centrifugal filters to 300 µl again (following its manufacturer  
412 instructions). The purified chromatin was divided into two equal portions. One was  
413 used for immunoprecipitation (ChIP+) and the other was used as a no antibody  
414 immunoprecipitation (ChIP-) control. The same volume of antibody as was used in  
415 the classic protocol was added for immunoprecipitation. The subsequent steps were  
416 same as those in the standard ChIP procedure. ChIP-qPCR was performed to study the  
417 effects of protein centrifugal filter concentration.

418

#### 419 **Analysis of the ChIP efficiency using an optimized immunoprecipitation buffer**

420 The OIP buffer (20 mM HEEPS-NaOH pH 7.5, 150 mM NaCl, 1 mM EDTA, 1%  
421 TritonX-100, 1 mM PMSF, proteinase inhibitors at 1 µg/ml each) was used to replace  
422 the ChIP Ab incubation buffer in the immunoprecipitation step. Other procedures and  
423 buffers were the same as those in the classic procedure described in above.  
424 ChIP-qPCR was used to compare the immunoprecipitation efficiency between using  
425 OIP and ChIP Ab incubation buffers.

426

#### 427 **Analysis of the effects of different concentrations of NaCl in OIP buffer**

428 To determine the optimal concentration of NaCl for immunoprecipitation, NaCl in  
429 the OIP buffer was used at 110, 120, 150, and 170 mM, and other reagents in OIP  
430 buffer were unchanged. Other procedures and buffers were the same as the classic  
431 procedure described in above. ChIP-qPCR was performed to investigate the most  
432 suitable NaCl concentration for immunoprecipitation.

433

#### 434 **Investigation of the effect of sucrose on immunoprecipitation**

435 To determine the effect of sucrose on immunoprecipitation, sucrose at 5, 7, 9 and  
436 11% (w/v) were added into the OIP buffer for immunoprecipitation. The other steps of  
437 ChIP followed the standard ChIP protocol. ChIP-qPCR was performed to study  
438 whether sucrose at different concentrations affected ChIP immunoprecipitation.

439

#### 440 **Comparison of different methods of crosslink reversal**

441 Two methods to recover DNA from crosslinked chromatin were compared. After  
442 the ChIP product elution (step 13), the eluted product was divided into two equal  
443 portions. Portion one was added with Proteinase K to a final concentration of 0.7  
444 µg/µl and incubated at 55 °C for 2 h to decompose the crosslink between the protein  
445 and chromatin. Portion two was subjected to chromatin crosslinking reversal  
446 following the classic procedure, i.e., added with NaCl to a final concentration of 0.2  
447 M, and incubated at 65 °C overnight.

448 Then, DNA was purified from these two portions using a DNA purification spin

---

449 column (Qiagen), and eluted with 60  $\mu$ l of TE buffer. To compare these two methods  
450 of recovery of DNA from crosslinked chromatin, qPCR was performed.

451

### 452 **Comparison of the methods to recover DNA from crosslinked chromatin**

453 Three methods to purify DNA from crosslinked chromatin were compared. After  
454 elution of the ChIP products (step 13), the eluted products were divided into three  
455 equal portions. Method one used reverse crosslinking from the classic method, i.e.  
456 following the procedure described at step 14 (as a control). In method two, the sample  
457 was added with proteinase K to a final concentration of 0.7  $\mu$ g/ $\mu$ l and incubated at  
458 55 °C for 2 h. In method three, crosslinking reversal was performed according to the  
459 method of Li et al (2014), i.e. NaCl to the final concentration of 0.2 M was added, and  
460 the sample was incubated at 65 °C for 6 h to reverse cross-linking. Then, 32.5  $\mu$ l of  
461 protease/RNase buffer (150 mM EDTA (pH 8.0), 615 mM Tris-HCl (pH 6.5), 14  
462 mg/ml proteinase K, and 0.30  $\mu$ g/ $\mu$ l RNase) was added and the mixture was incubated  
463 at 45 °C for 1 h.

464 The products from these three methods were extracted separately with an equal  
465 volume of Tris-phenol (pH 8.0) and chloroform (1:1 v/v), and then extracted with an  
466 equal volume of chloroform. Ten microliters of supernatant was electrophoresed  
467 through an agarose gel to determine the quantity of DNA.

468

### 469 **The protocol of the newly developed ChIP technique**

470 The improved ChIP protocol was developed (Fig. 6) using the following procedures.  
471 Step 1 used 3% formaldehyde instead of 1% formaldehyde for chromatin crosslinking.  
472 Step 2–7 were the same as classic protocol described above. In step 8, 200  $\mu$ l of the  
473 supernatant was diluted 10-fold by adding 1.8 ml of OIP buffer (supplemented with  
474 7% sucrose), and was concentrated using protein centrifugal filters (30 kDa cutoff) to  
475 300  $\mu$ l. Then, a 2700  $\mu$ l of OIP buffer (supplemented with 7% sucrose) was added and  
476 mixed well. The sample was then concentrated using centrifugal filters to 400  $\mu$ l. In  
477 step 10, two portions of 200  $\mu$ l of the chromatin solution from step 8 were taken. One  
478 portion was added with 6  $\mu$ l of the target antibody as the ChIP sample (ChIP+), the



---

479 other portion had antibody added (or was added with another antibody) as the mock  
480 control (ChIP-), and incubated at 4 °C overnight. Steps 11–14 followed the classic  
481 protocol. In step 15, the elution buffer was added with proteinase K to a final  
482 concentration of 0.2 µg/µl and incubated at 55 °C for 2 h. Step 16 was the same as the  
483 classic protocol. The detailed protocol of developed ChIP was shown as  
484 Supplementary file 1.

485

#### 486 **Quantitative real-time PCR analysis**

487 Quantitative real-time PCR was performed on a qTower 2.2 (Analytik Jena AG, Jena,  
488 Germany). The PCR reaction system contained 10 µl of SYBR Green Real-time PCR  
489 Master Mix (Toyobo, Osaka, Japan), 0.5 µM of each forward and reverse primes, and  
490 2 µL of ChIP product as the PCR template, with a total volume of 20 µl. The PCR  
491 reaction was conducted with the following parameters: 94 °C for 1 min; 40 cycles of  
492 94 °C for 12 s, 58 °C for 30 s, and 72 °C for 45 s. Melting curves were generated for  
493 each reaction to identify the specificity of the PCR reaction. The DNA sequence of  
494 ubiquitin (FG065618) and ACT7 (AT5G09810) were used as the internal controls in  
495 birch and Arabidopsis, respectively. The primers for ChIP-PCR used in birch were the  
496 same as those used by Guo et al (2017), and the primers used in Arabidopsis were the  
497 same as those used by Xu et al (2018). The primers used for ChIP-qPCR are shown in  
498 Table S1.

499

#### 500 **Reagents**

501 Sucrose (Sigma-Aldrich); Formaldehyde solution 37% (wt/wt) (Sigma-Aldrich);  
502 Glycine (Fisher Scientific); Tris base (Promega); Hydrochloric acid (HCl;  
503 Sigma-Aldrich); PMSF, aprotinin, leupeptin, and pepstatin A (Sigma-Aldrich); DMSO  
504 (Sigma-Aldrich); β-Mercaptoethanol (Sigma-Aldrich); Miracloth (Calbiochem, San  
505 Diego, CA, USA); anti-FLAG antibody (Sigma-Aldrich , SAB4301135); anti-GFP  
506 antibody(Sigma-Aldrich, SAB4301138); protein A/G Agarose beads (Beyotime  
507 Biotechnology, Shanghai, China); Triton X-100 (Solarbio); EDTA disodium salt  
508 (Solarbio); Proteinase K (Promega); RNase A solution (Promega).

509

510 **ChIP Buffers**

511 Buffer A comprised 10 mM Tris-HCl (pH 8.0), 0.4 M sucrose, 1.0 % w/v  
512 formaldehyde, 1 mM PMSF, proteinase inhibitors (aprotinin, leupeptin, pepstatin A , 1  
513 µg/ml each), and 5 mM β-mercaptoethanol.

514 Buffer B comprised 10 mM Tris-HCl (pH 8.0), 0.4 M sucrose, 5 mM MgCl<sub>2</sub>, 5 mM  
515 β-mercaptoethanol, 1 mM PMSF, and proteinase inhibitors (aprotinin, leupeptin,  
516 pepstatin A) at 1 µg/ml each.

517 Buffer C comprised 10 mM Tris-HCl (pH 8.0), 0.25 M sucrose, 10 mM MgCl<sub>2</sub>, 1.2%  
518 Triton X-100, 5 mM 2-mercaptoethanol, 1 mM PMSF, and proteinase inhibitors  
519 (aprotinin, leupeptin, pepstatin A) at 1 µg/ml each.

520 Buffer D comprised 10 mM Tris/HCl pH 8.0, 0.7 M sucrose, 2 mM MgCl<sub>2</sub>, 5 mM  
521 2-mercaptoethanol, 1 mM PMSF, and proteinase inhibitors (aprotinin, leupeptin,  
522 pepstatin A) at 1 µg/ml each.

523 Buffer E comprised (10 mM Tris/HCl pH 8.0, 2.0 M sucrose, 2 mM MgCl<sub>2</sub>, 5 mM  
524 2-mercaptoethanol, 1 mM PMSF, and proteinase inhibitors (aprotinin, leupeptin,  
525 pepstatin A) at 1 µg/ml each.

526 Lysis buffer comprised 50 mM Tris pH 8.0, 10 mM EDTA, 1 % w/v SDS, 1 mM  
527 PMSF, and proteinase inhibitors (aprotinin, leupeptin, pepstatin A) at 1 µg/ml each.

528 ChIP Ab incubation buffer comprised 20 mM Tris pH 8.0, 1.2 mM EDTA, 1.2% v/v  
529 Triton X-100, 150 mM NaCl, 1 mM PMSF, and proteinase inhibitors (aprotinin,  
530 leupeptin, pepstatin A) 1 µg/ml each.

531 Low Salt Buffer comprised 20 mM Tris pH 8.0, 2 mM EDTA, 0.1% w/v SDS, 1% v/v  
532 Triton X-100, and 150 mM NaCl).

533 High salt buffer comprised 20 mM Tris-HCl, pH 8.0, 500 mM NaCl, 0.1% SDS, 1%  
534 Triton X-100, and 1 mM EDTA) (wash three times);

535 LiCl wash buffer comprised 25 mM LiCl, 0.1% sodium deoxycholate, 1 mM EDTA,  
536 and 20 mM Tris-HCl, pH 8.0 (two washes).

537 TE buffer comprised 10 mM Tris-HCl, pH 8.0, and 1 mM EDTA (two washes).

538 Elution buffer comprised 50 mM Tris pH 8.0, 10 mM EDTA, and 1% SDS.

539

540 **ACKNOWLEDGMENTS**

541 Not applicable.

542

543 **CONSENT FOR PUBLICATION**

544 Not applicable.

545

546 **COMPETING INTERESTS**

547 The authors declare that they have no competing interests.

548

549 **Author details**

550 <sup>1</sup>State Key Laboratory of Tree Genetics and Breeding, Northeast Forestry University,  
551 26 Hexing Road, Harbin 150040, China

552

553 **REFERENCES**

554 Bowler C, Benvenuto G, Laflamme P, Molino D, Probst AV, Tariq M, Paszkowski J  
555 (2014) Chromatin techniques for plant cells. *The Plant Journal* 39:776-789

556 Gendrel AV, Lippman Z, Martienssen R, Colot V (2005) Profiling histone  
557 modification patterns in plants using genomic tiling microarrays. *Nature*  
558 *Methods* 2:213-218

559 Guo HY, Wang YC, Wang LQ, Hu P, Wang YM, Jia YY, Zhang CR, Zhang Y, Zhang  
560 YM, Wang C, Yang CP (2017) Expression of the MYB transcription factor  
561 geneBplMYB46 affects abiotic stress tolerance and secondary cell wall  
562 deposition in *Betula platyphylla*. *Plant Biotechnology Journal* 15:107-121

563 Haring M, Offermann S, Danker T, Horst I, Peterhaensel C, Stam M (2007)  
564 Chromatin immunoprecipitation: optimization, quantitative analysis and data  
565 normalization. *Plant Methods* 3:11

566 Kaufmann K, Muiño JM, Østerås M, Farinelli L, Krajewski P, Angenent GC (2010)  
567 Chromatin immunoprecipitation (ChIP) of plant transcription factors followed by  
568 sequencing (ChIP-SEQ) or hybridization to whole genome arrays (ChIP-CHIP).  
569 *Nature Protocols* 5:457-472

570 Li W, Lin YC, Li Q, Shi R, Lin CY, Chen H, Chuang L, Qu GZ, Sederoff RR, Chiang  
571 VL (2014) A robust chromatin immunoprecipitation protocol for studying  
572 transcription factor-DNA interactions and histone modifications in wood-forming  
573 tissue. *Nature Protocols* 9:2180-2193

574 Saleh A, Alvarez-Venegas R, Avramova Z (2008) An efficient chromatin  
575 immunoprecipitation (ChIP) protocol for studying histone modifications in  
576 *Arabidopsis* plants. *Nature Protocol* 3:1018-1025

577

578 Tsugama D, Liu S, Takano T (2013) A bZIP protein, VIP1, interacts with Arabidopsis  
579 heterotrimeric G protein  $\beta$  subunit, AGB1. *Plant Physiology and Biochemistry*  
580 71:240-246

581 Verkest A, Abeel T, Heyndrickx KS, Van Leene J, Lanz C, Van De Slijke E, De Winne  
582 N, Eeckhout D, Persiau G, Van Breusegem F, Inze D, Vandepoele K, De Jaeger G  
583 (2014) A Generic Tool for Transcription Factor Target Gene Discovery in  
584 Arabidopsis Cell Suspension Cultures Based on Tandem Chromatin Affinity  
585 Purification. *Plant physiol* 164:1122-1133

586 Xu HY, Shi XX, He L, Guo Y, Zang DD, Li HY, Zhang WH, Wang YC (2018)  
587 Arabidopsis thaliana Trihelix Transcription Factor AST1 Mediates Salt and  
588 Osmotic Stress Tolerance by Binding to a Novel AGAG-Box and Some GT  
589 Motifs. *Plant and Cell Physiology* 59:946-965

590 Zentner DE, Henikoff S (2014) High-resolution digital profiling of the epigenome.  
591 *Nature Reviews Genetics* 15:814-827

592

### 593 **Supplemental materials**

594 **Supplemental file 1.** The procedure of new developed ChIP.

595 **Supplemental Table 1.** The primers used in ChIP-qPCR

596

### 597 **Figure legends**

598 **Figure 1. Comparison of decrosslinking caused by sonication between chromatin**  
599 **crosslinked by 1% and 3% formaldehyde.**

600 Four truncated promoters from birch that had been confirmed to be directly bound by  
601 Bp1MYB46 were studied. The chromatin was crosslinked with 1% or 3%  
602 formaldehyde, and treated with sonication. After sonication, the de-crosslinked DNA  
603 was harvested by extraction with Tris-phenol and chloroform, and analyzed using  
604 qPCR. Three independent experiments were performed, and data are means  $\pm$  SD  
605 from three replicates.

606

607 **Figure 2. Concentration of chromatin using protein centrifugal filters significantly**  
608 **improves ChIP efficiency.**

609 Formaldehyde crosslinked chromatin was purified and concentrated using protein  
610 ultrafiltration centrifugal tube, and then was used for immunoprecipitation. Con: Fold

---

611 enrichment in the standard ChIP protocol. Concentration: Fold enrichment of ChIP  
612 performed with concentrated chromatin with centrifugal filter. The relative fold  
613 enrichment was calculated as: Concentration/Con. Four truncated promoters of genes  
614 from *B. platyphylla* that were previously confirmed to be directly regulated by  
615 *BplMYB46* were analyzed, and their fold enrichments were determined using  
616 ChIP-qPCR. Three independent experiments were performed, and data are means  $\pm$   
617 SD from three replicates.

618

619 **Figure 3. Determination of ChIP efficiency using the optimized**  
620 **immunoprecipitation buffer.**

621 The OIP (optimized immunoprecipitation) buffer was used for immunoprecipitation,  
622 and the immunoprecipitation buffer from the standard ChIP protocol was used as a  
623 control. Con: Fold enrichment of ChIP performed using ChIP Ab incubation buffer  
624 from the classic protocol, which was used as control; OIP: Fold enrichment of ChIP  
625 performed using the OIP buffer. The relative fold enrichment was calculated as:  
626 OIP/Con. Four truncated promoters of genes directly regulated by *BplMYB46* were  
627 studied in *B. platyphylla* using ChIP-qPCR. Three independent experiments were  
628 performed, and data are means  $\pm$  SD from three replicates.

629

630 **Figure 4. Determination of the optimum NaCl concentration for**  
631 **immunoprecipitation.**

632 Different concentrations of NaCl in the OIP (optimized immunoprecipitation) buffer  
633 were studied for ChIP immunoprecipitation, and ChIP-qPCR was performed to  
634 determine the fold enrichment Four truncated promoters of genes in *B. platyphylla*  
635 were studied using ChIP-qPCR. Three independent experiments were performed, and  
636 data are means  $\pm$  SD from three replicates.

637

638 **Figure 5. Determination of the effects of sucrose on immunoprecipitation**  
639 **efficiency.**

---

640 Different concentrations of sucrose were added into the OIP (optimized  
641 immunoprecipitation) buffer, and immunoprecipitation was performed. Con: Fold  
642 enrichment of ChIP performed using OIP buffer without sucrose (control). 5, 7, 9 and  
643 11% sucrose: fold enrichment of ChIP performed using 5, 7, 9 and 11% of sucrose in  
644 the OIP buffer. The relative fold enrichment was calculated as 5, 7, 9 and 11%/Con.  
645 Four truncated promoters of genes directly regulated by *BplMYB46* were studied in *B.*  
646 *platyphylla* using ChIP-qPCR. Three independent experiments were performed, and  
647 data are means  $\pm$  SD from three replicates.

648

649 **Figure 6. Comparison of methods of crosslinking reversal in ChIP.**

650 ChIP was performed according to the classic protocol and the eluted ChIP DNA was  
651 divided equally into two portions, which were used for crosslinking reversal using two  
652 methods. Method 1: Proteinase K direct digestion to substitute for crosslinking  
653 reversal; method 2: crosslinking reversal using NaCl at 65 °C overnight. ChIP-qPCR  
654 was conducted to determine the amounts of ChIP DNA. Proteinase K: Fold  
655 enrichment of ChIP performed using method 1; Con: Fold enrichment of ChIP  
656 performed using method 2 as the control. The relative ChIP fold enrichment was  
657 calculated as: Proteinase K/Con. Four truncated promoters of genes directly regulated  
658 by *BplMYB46* were studied in *B. platyphylla* using ChIP-qPCR. Three independent  
659 experiments were performed, and data are means  $\pm$  SD from three replicates.

660

661 **Figure 7. Determination of the efficiency of different crosslinking reversal**  
662 **methods.**

663 Three methods were performed on birch chromatin. Method 1: Reversal of  
664 crosslinking using NaCl at 65 °C overnight; method 2: Proteinase K digestion after  
665 crosslinking reversal using NaCl at 65 °C for 6 h; method 3: Proteinase K direct  
666 digestion at 55 °C for 2 h. +DC: samples were decrosslinked. -DC: samples were not  
667 decrosslinked. After these three methods were performed, the chromatin was extracted  
668 using one volume of Tris-phenol and chloroform (1:1 v/v), followed by extraction  
669 using one volume of chloroform. The supernatant was electrophoresed through an

---

670 agarose gel to determine the quantity of decrosslinked DNA. M: DNA marker; Line 1,  
671 2, 3: Crosslinking reversal of chromatin using methods 1, 2, and 3, respectively.

672

673 **Figure 8. The procedure for the newly developed ChIP protocol.**

674 The outline of the developed ChIP. a: The procedures for standard ChIP; b: The  
675 procedures for the newly developed ChIP. The optimized procedures are marked with  
676 red frames, which included crosslinking protein and chromatin using 3%  
677 formaldehyde instead of 1% formaldehyde; purification and concentration of  
678 chromatin using protein centrifugal filters; using OIP (optimized immunoprecipitation)  
679 buffer instead of standard ChIP Ab incubation buffer for immunoprecipitation;  
680 sucrose was added to improve the immunoprecipitation efficiency, and crosslinking  
681 reversal was achieved using proteinase K directly. The detailed procedures are shown  
682 as supplementary file 1.

683

684 **Figure 9. Analysis of the developed ChIP protocol for ChIP enrichment.**

685 ChIP was carried out using the improved ChIP protocol and the standard ChIP  
686 protocol. The fold enrichment of ChIP was studied using ChIP-qPCR. Classic: fold  
687 enrichment of ChIP performed using the standard ChIP protocol; New: fold  
688 enrichment of ChIP performed using the new ChIP protocol. The relatively ChIP fold  
689 enrichment were calculated as: New/Classic. (a, b) The ChIP fold enrichment values  
690 were compared between the classic and the new ChIP protocol in *B. platyphylla* (a)  
691 and *A. thaliana* (b). c: The Arabidopsis plants overexpression of GFP were used as  
692 material for ChIP, and immunoprecipitation was performed with antiGFP antibody (as  
693 negative control). Four truncated promoters of genes from *B. platyphylla* and four  
694 truncated promoters of genes from *A. thaliana* were analyzed using ChIP-qPCR.  
695 Three independent experiments were performed, and data are means  $\pm$  SD from three  
696 replicates.

697

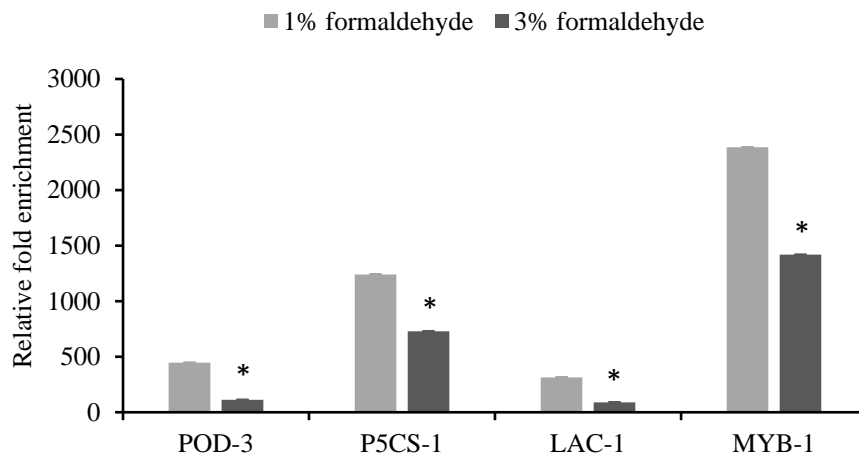

**Figure 1. Comparison of decrosslinking caused by sonication between chromatin crosslinked by 1% and 3% formaldehyde.**

Four truncated promoters from birch that had been confirmed to be directly bound by BplMYB46 were studied. The chromatin was crosslinked with 1% or 3% formaldehyde, and treated with sonication. After sonication, the de-crosslinked DNA was harvested by extraction with Tris-phenol and chloroform, and analyzed using qPCR. Three independent experiments were performed, and data are means  $\pm$  SD from three replicates.



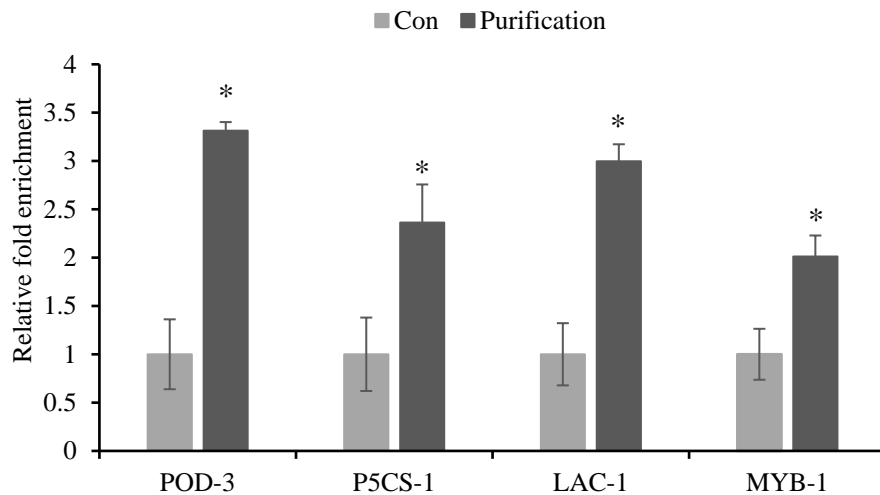

**Figure 2. Concentration of chromatin using protein centrifugal filters significantly improves ChIP efficiency.**

Formaldehyde crosslinked chromatin was purified and concentrated using protein ultrafiltration centrifugal tube, and then was used for immunoprecipitation. Con: Fold enrichment in the standard ChIP protocol. Concentration: Fold enrichment of ChIP performed with concentrated chromatin with centrifugal filter. The relative fold enrichment was calculated as: Concentration/Con. Four truncated promoters of genes from *B. platyphylla* that were previously confirmed to be directly regulated by *BpIMYB46* were analyzed, and their fold enrichments were determined using ChIP-qPCR. Three independent experiments were performed, and data are means  $\pm$  SD from three replicates.

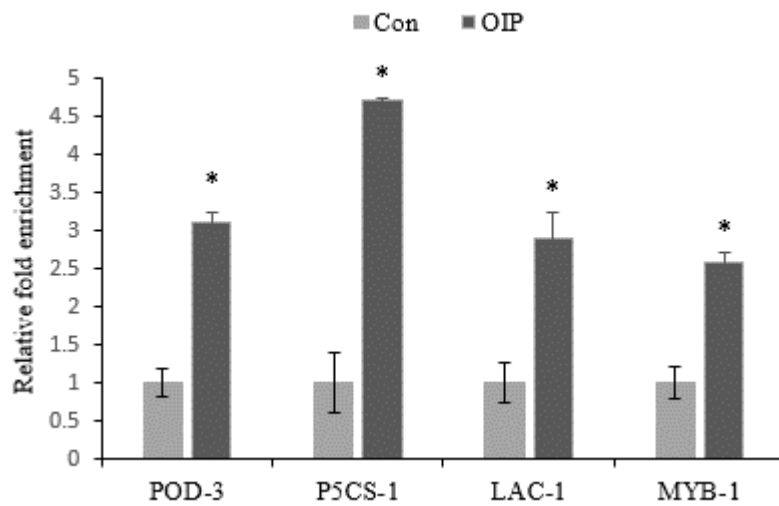

**Figure 3. Determination of ChIP efficiency using the optimized immunoprecipitation buffer.**

The OIP (optimized immunoprecipitation) buffer was used for immunoprecipitation, and the immunoprecipitation buffer from the standard ChIP protocol was used as a control. Con: Fold enrichment of ChIP performed using ChIP Ab incubation buffer from the classic protocol, which was used as control; OIP: Fold enrichment of ChIP performed using the OIP buffer. The relative fold enrichment was calculated as: OIP/Con. Four truncated promoters of genes directly regulated by *BpIMYB46* were studied in *B. platyphylla* using ChIP-qPCR. Three independent experiments were performed, and data are means  $\pm$  SD from three replicates.

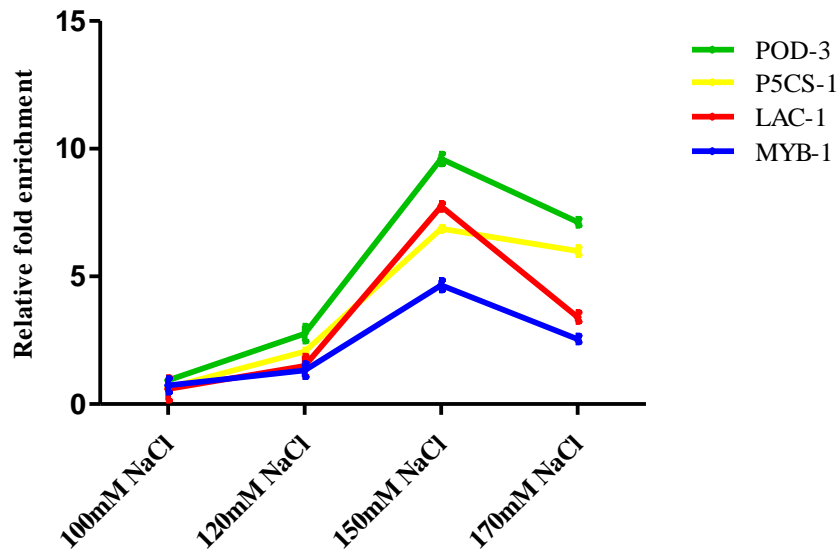

**Figure 4. Determination of the optimum NaCl concentration for immunoprecipitation.**

Different concentrations of NaCl in the OIP (optimized immunoprecipitation) buffer were studied for CHIP immunoprecipitation, and CHIP-qPCR was performed to determine the fold enrichment. Four truncated promoters of genes in *B. platyphylla* were studied using CHIP-qPCR. Three independent experiments were performed, and data are means  $\pm$  SD from three replicates.

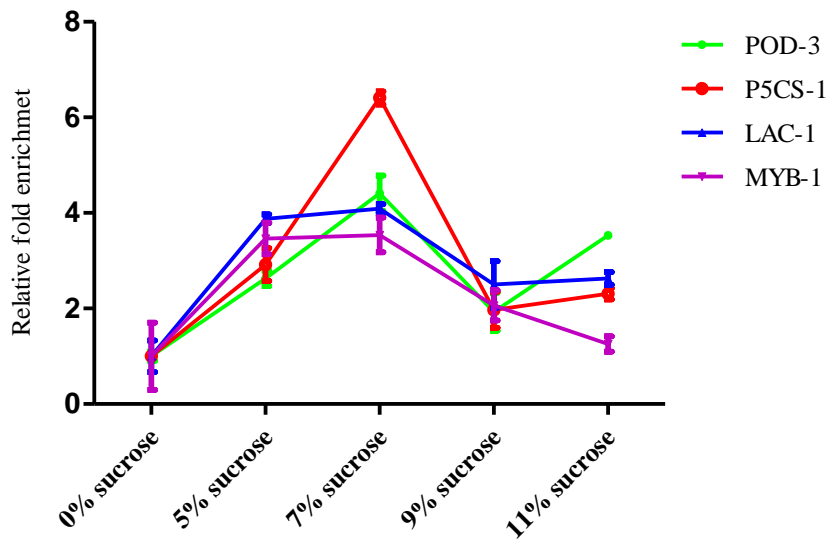

**Figure 5. Determination of the effects of sucrose on immunoprecipitation efficiency.**

Different concentrations of sucrose were added into the OIP (optimized immunoprecipitation) buffer, and immunoprecipitation was performed. Con: Fold enrichment of ChIP performed using OIP buffer without sucrose (control). 5, 7, 9 and 11% sucrose: fold enrichment of ChIP performed using 5, 7, 9 and 11% of sucrose in the OIP buffer. The relative fold enrichment was calculated as 5, 7, 9 and 11%/Con. Four truncated promoters of genes directly regulated by *BpIMYB46* were studied in *B. platyphylla* using ChIP-qPCR. Three independent experiments were performed, and data are means  $\pm$  SD from three replicates.

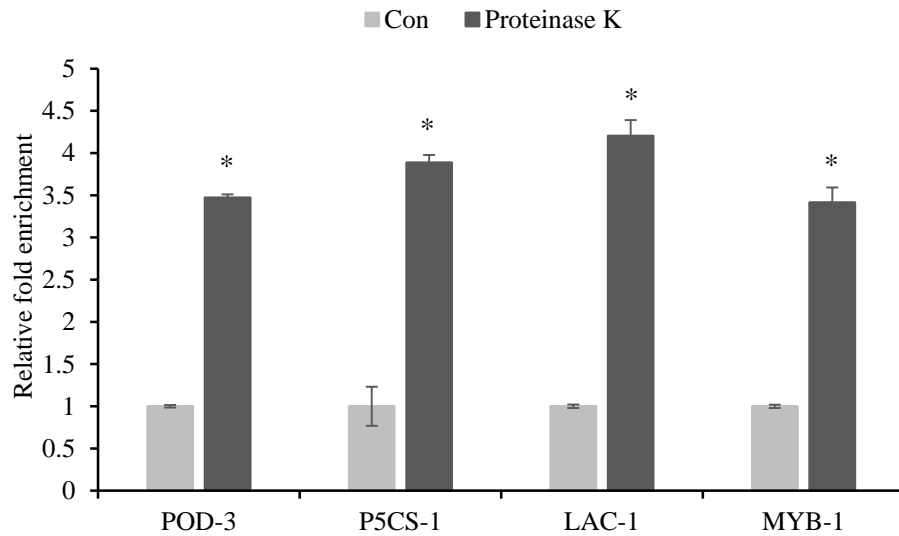

**Figure 6. Comparison of methods of crosslinking reversal in ChIP.**

ChIP was performed according to the classic protocol and the eluted ChIP DNA was divided equally into two portions, which were used for crosslinking reversal using two methods. Method 1: Proteinase K direct digestion to substitute for crosslinking reversal; method 2: crosslinking reversal using NaCl at 65 °C overnight. ChIP-qPCR was conducted to determine the amounts of ChIP DNA. Proteinase K: Fold enrichment of ChIP performed using method 1; Con: Fold enrichment of ChIP performed using method 2 as the control. The relative ChIP fold enrichment was calculated as: Proteinase K/Con. Four truncated promoters of genes directly regulated by *BplMYB46* were studied in *B. platyphylla* using ChIP-qPCR. Three independent experiments were performed, and data are means  $\pm$  SD from three replicates.

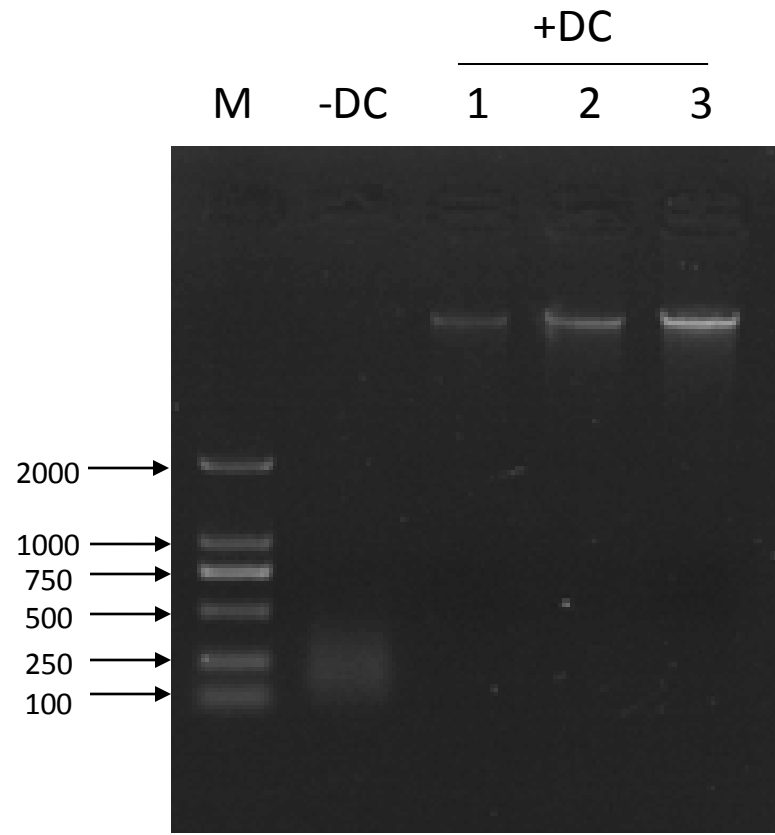

**Figure 7. Determination of the efficiency of different crosslinking reversal methods.**

Three methods were performed on birch chromatin. Method 1: Reversal of crosslinking using NaCl at 65 ° C overnight; method 2: Proteinase K digestion after crosslinking reversal using NaCl at 65 ° C for 6 h; method 3: Proteinase K direct digestion at 55 ° C for 2 h. +DC: samples were decrosslinked. -DC: samples were not decrosslinked. After these three methods were performed, the chromatin was extracted using one volume of Tris-phenol and chloroform (1:1 v/v), followed by extraction using one volume of chloroform. The supernatant was electrophoresed through an agarose gel to determine the quantity of decrosslinked DNA. M: DNA marker; Line 1, 2, 3: Crosslinking reversal of chromatin using methods 1, 2, and 3, respectively.

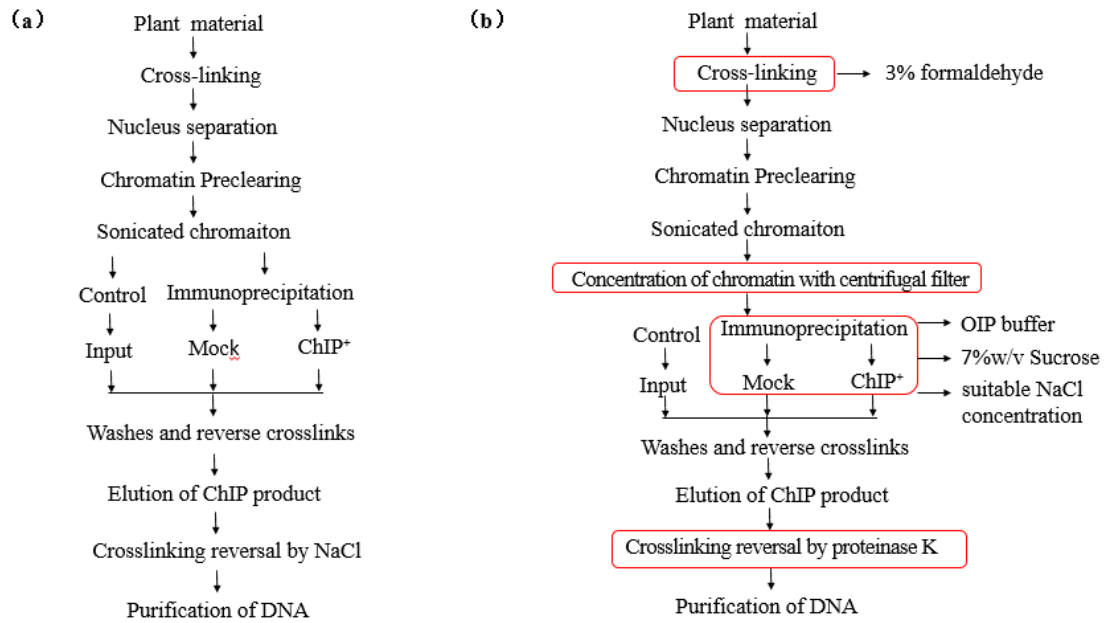

**Figure 8. The procedure for the newly developed ChIP protocol.**

The outline of the developed ChIP. (a): The procedures for standard ChIP; (b): The procedures for the newly developed ChIP. The optimized procedures are marked with red frames, which included crosslinking protein and chromatin using 3% formaldehyde instead of 1% formaldehyde; purification and concentration of chromatin using protein centrifugal filters; using OIP (optimized immunoprecipitation) buffer instead of standard ChIP Ab incubation buffer for immunoprecipitation; sucrose was added to improve the immunoprecipitation efficiency, and crosslinking reversal was achieved using proteinase K directly. The detailed procedures are shown as supplementary file 1.

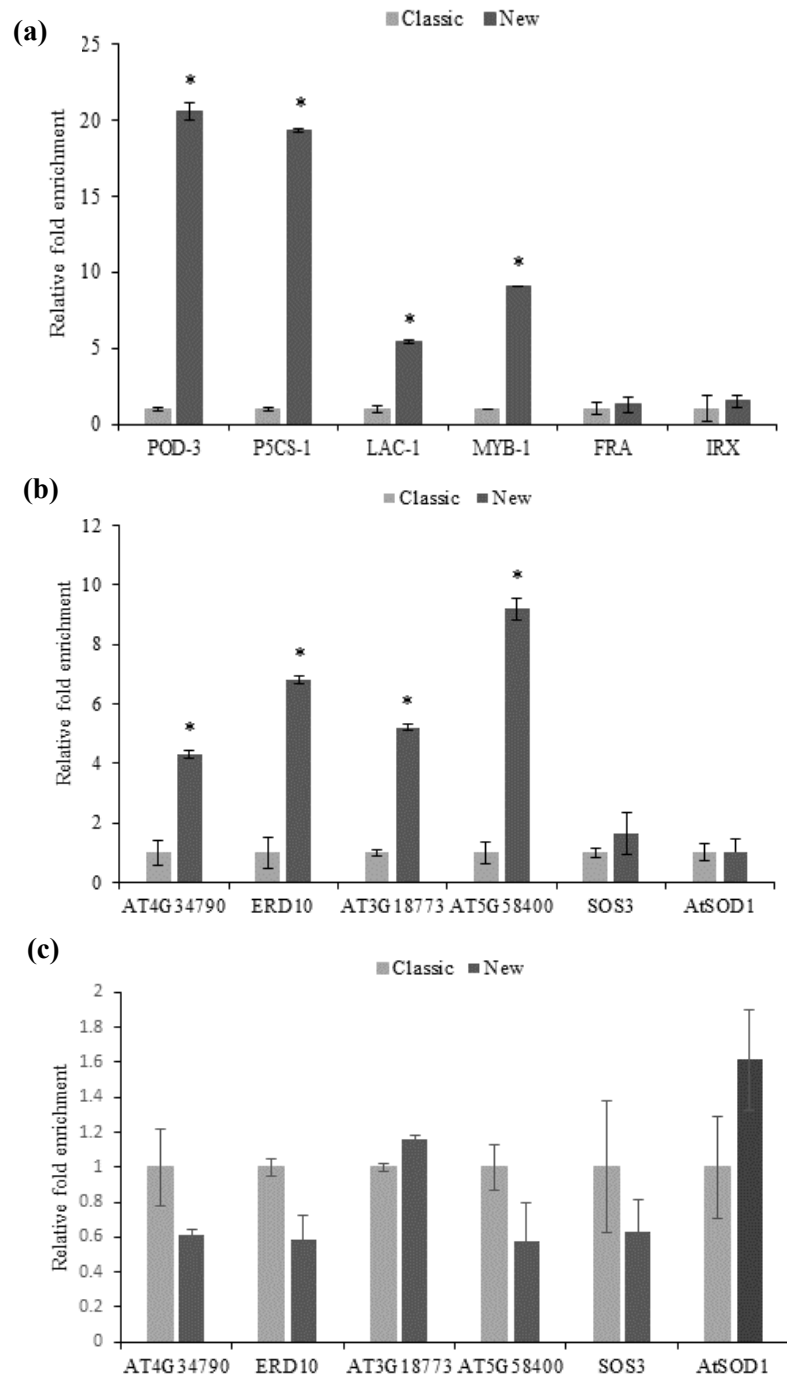

**Figure 9. Analysis of the developed ChIP protocol for ChIP enrichment.**

ChIP was carried out using the improved ChIP protocol and the standard ChIP protocol. The fold enrichment of ChIP was studied using ChIP-qPCR. Classic: fold enrichment of ChIP performed using the standard ChIP protocol; New: fold enrichment of ChIP performed using the new ChIP protocol. The relatively ChIP fold enrichment were calculated as: New/Classic. (a, b) The ChIP fold enrichment values were compared between the classic and the new ChIP protocol in *B. platyphylla* (a) and *A. thaliana* (b). (c): The Arabidopsis plants overexpression of GFP were used as material for ChIP, and immunoprecipitation was performed with antiGFP antibody (as negative control). Four truncated promoters of genes from *B. platyphylla* and four truncated promoters of genes from *A. thaliana* were analyzed using ChIP-qPCR. Three independent experiments were performed, and data are means  $\pm$  SD from three replicates.



## Parsed Citations

**Bowler C, Benvenuto G, Laflamme P, Molino D, Probst AV, Tariq M, Paszkowski J (2014) Chromatin techniques for plant cells. The Plant Journal 39:776-789**

Pubmed: [Author and Title](#)

Google Scholar: [Author Only](#) [Title Only](#) [Author and Title](#)

**Gendrel AV, Lippman Z, Martienssen R, Colot V (2005) Profiling histone modification patterns in plants using genomic tiling microarrays. Nature Methods 2:213-218**

Pubmed: [Author and Title](#)

Google Scholar: [Author Only](#) [Title Only](#) [Author and Title](#)

**Guo HY, Wang YC, Wang LQ, Hu P, Wang YM, Jia YY, Zhang CR, Zhang Y, Zhang YM, Wang C, Yang CP (2017) Expression of the MYB transcription factor geneBplMYB46 affects abiotic stress tolerance and secondary cell wall deposition inBetula platyphylla. Plant Biotechnology Journal 15:107-121**

Pubmed: [Author and Title](#)

Google Scholar: [Author Only](#) [Title Only](#) [Author and Title](#)

**Haring M, Offermann S, Danker T, Horst I, Peterhaensel C, Stam M (2007) Chromatin immunoprecipitation: optimization, quantitative analysis and data normalization. Plant Methods 3:11**

Pubmed: [Author and Title](#)

Google Scholar: [Author Only](#) [Title Only](#) [Author and Title](#)

**Kaufmann K, Muiño JM, Østerås M, Farinelli L, Krajewski P, Angenent GC (2010) Chromatin immunoprecipitation (ChIP) of plant transcription factors followed by sequencing (ChIP-SEQ) or hybridization to whole genome arrays (ChIP-CHIP). Nature Protocols 5:457-472**

Pubmed: [Author and Title](#)

Google Scholar: [Author Only](#) [Title Only](#) [Author and Title](#)

**Li W, Lin YC, Li Q, Shi R, Lin CY, Chen H, Chuang L, Qu GZ, Sederoff RR, Chiang VL (2014) A robust chromatin immunoprecipitation protocol for studying transcription factor-DNA interactions and histone modifications in wood-forming tissue. Nature Protocols 9:2180-2193**

Pubmed: [Author and Title](#)

Google Scholar: [Author Only](#) [Title Only](#) [Author and Title](#)

**Saleh A, Alvarez-Venegas R, Avramova Z (2008) An efficient chromatin immunoprecipitation (ChIP) protocol for studying histone modifications in Arabidopsis plants. Nature Protocol 3:1018-1025**

Pubmed: [Author and Title](#)

Google Scholar: [Author Only](#) [Title Only](#) [Author and Title](#)

**Tsugama D, Liu S, Takano T (2013) A bZIP protein, VIP1, interacts with Arabidopsis heterotrimeric G protein  $\beta$  subunit, AGB1. Plant Physiology and Biochemistry 71:240-246**

Pubmed: [Author and Title](#)

Google Scholar: [Author Only](#) [Title Only](#) [Author and Title](#)

**Verkest A, Abeel T, Heyndrickx KS, Van Leene J, Lanz C, Van De Slijke E, De Winne N, Eeckhout D, Persiau G, Van Breusegem F, Inze D, Vandepoele K, De Jaeger G (2014) A Generic Tool for Transcription Factor Target Gene Discovery in Arabidopsis Cell Suspension Cultures Based on Tandem Chromatin Affinity Purification. Plant physiol 164:1122-1133**

Pubmed: [Author and Title](#)

Google Scholar: [Author Only](#) [Title Only](#) [Author and Title](#)

**Xu HY, Shi XX, He L, Guo Y, Zang DD, Li HY, Zhang WH, Wang YC (2018) Arabidopsis thaliana Trihelix Transcription Factor AST1 Mediates Salt and Osmotic Stress Tolerance by Binding to a Novel AGAG-Box and Some GT Motifs. Plant and Cell Physiology 59:946-965**

Pubmed: [Author and Title](#)

Google Scholar: [Author Only](#) [Title Only](#) [Author and Title](#)

**Zentner DE, Henikoff S (2014) High-resolution digital profiling of the epigenome. Nature Reviews Genetics 15:814-827**

Pubmed: [Author and Title](#)

Google Scholar: [Author Only](#) [Title Only](#) [Author and Title](#)
